# Supplementary material for: Electronic structure and photo/cathodoluminescence properties investigation of green emission phosphor NaBaScSi2O7:Eu2+with high thermal stability
Source: Royal Society of Chemistry journal article supplement (doi:10.1039/c4ce00523f), 2014-01-01
Supplement: c4ce00523f1.pdf [file c4ce00523f1.pdf]

Supporting Information

**Electronic structure and photo/cathodoluminescence properties  
investigation of a green emission phosphor NaBaScSi<sub>2</sub>O<sub>7</sub>:Eu<sup>2+</sup> with  
high thermal stability**

**Ge Zhu, Yurong Shi, Masayoshi Mikami, Yasuo Shimomura, and Yuhua Wang\***

*Received (in XXX, XXX) Xth XXXXXXXXX 20XX, Accepted Xth XXXXXXXXX 20XX*

DOI: 10.1039/b000000x

Table S1 The effective ionic radii of Na, Ba<sup>2+</sup> and Eu<sup>2+</sup> ions with different coordination numbers

|                | Na <sup>+</sup> (Å) | Ba <sup>2+</sup> (Å) | Eu <sup>2+</sup> (Å) |
|----------------|---------------------|----------------------|----------------------|
| 8 coordination | 1.18                | 1.42                 | 1.25                 |
| 9 coordination | 1.24                | 1.47                 | 1.30                 |

Table S2 The fitting parameters of the decay curves of NaBaScSi<sub>2</sub>O<sub>7</sub>:0.001Eu<sup>2+</sup> excited at 300 nm and monitored at 427 and 505 nm.

|                                                                          | $\tau_1$ (s) | $\tau_2$ (s) | A <sub>1</sub> | A <sub>2</sub> |
|--------------------------------------------------------------------------|--------------|--------------|----------------|----------------|
| $\lambda_{\text{ex}}=300 \text{ nm}, \lambda_{\text{em}}=427 \text{ nm}$ | 6.114E-007   | 2.170E-007   | 1041.652       | 268.818        |
| $\lambda_{\text{ex}}=300 \text{ nm}, \lambda_{\text{em}}=505 \text{ nm}$ | 8.976E-007   | 1.000E-006   | 1835.441       | -534.731       |

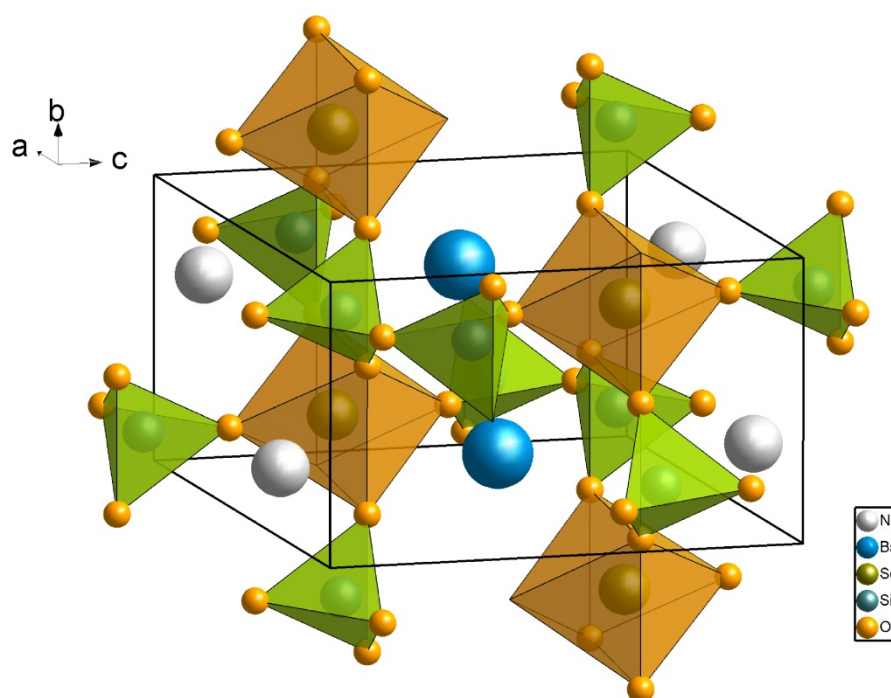

Figure S1 The crystal structure diagram of monoclinic NaBaScSi<sub>2</sub>O<sub>7</sub>
